# Supplementary material for: Uncovering the onset and progression of ferroptosis via live-cell imaging
Source: Research Square preprint supplement (doi:10.21203/rs.3.rs-5253612/v1), 2024-10-30
Supplement: Supplementary file 1 [file 297bb7de95a237c2ba693eb5.docx]

**Uncovering the onset and progression of ferroptosis via live-cell imaging**

Laiyi Xu‡, Wenzhou Zhang‡, Julia McCain, Terri Lovell, Gonzalo Cosa*

Department of Chemistry and Quebec Center for Advanced materials (QCAM), McGill University, Montreal, QC, H3A 0B8, Canada

This section includes:

**Supplementary Methods**

Synthesis of fluorogenic RTAs (Page S2)

Synthesis of fluorescent control analogues (Page S13)

References (Page S21)

NMR (Page S22)

**General Synthetic Details**. Moisture sensitive reactions were carried out under argon atmosphere using Schlenk and standard syringe/septa techniques. Tetrahydrofuran, dichloromethane, and toluene were dried by filtration through alumina according to the methods describes by Grubbs. Silica column chromatography was conducted with Silicycle 230-400 Grade 60 A silica gel. Automated flash chromatography was performed using a Biotage Isolera One. Thin Layer Chromatography (TLC) was performed using Silicycle TLC Glass Plates SG60 250 um F254. Developed plates were visualized using UV light at wavelengths of 254 and 365 nm. 1H NMR spectra were recorded at 500 MHz on a Bruker AVIIIHD, a Varian Inova QANUC, a Varian VNMRS, or at 400 MHz on a Varian Mercury NMR spectrometer. 13C NMR spectra were recorded at 126 MHz on a Bruker AVIIIHD, a Varian Inova QANUC, a Varian VNMRS NMR spectrometer. All 1H NMR spectra were taken in either CDCl3 (referenced to TMS, δ 0.00 ppm) or CD3OD. All 13C NMR spectra were taken in CDCl3 (referenced to chloroform, δ 77.16 ppm) or CD3OD. Electrospray ionization (ESI) mass spectra were measured on a Bruker maXis impact. Absorption spectra were recorded using a Hitachi U-2800 UV−vis−NIR spectrophotometer. Luminescence spectra were recorded using a PTI QuantaMaster spectrofluorimeter using 1 cm × 1 cm quartz cuvettes. Spectra were corrected for detector sensitivity.

**3**18**.** Anhydrous toluene (8 mL) was added to **1**1 (0.3 g, 1 mmol, 1 equiv.). The flask was equipped with a stir bar and septa. It was then evacuated and filled with argon 3 times. Dimethylformamide (1 drop) was added while stirring, followed by thionyl chloride (0.09 mL, 1.3 mmol, 1.2 equiv.). The reaction was stirred at 50 for 1 h. Volatiles were removed under reduced pressure. Residue thionyl chloride was then removed by co-evaporation with anhydrous toluene (8 mL, 2 times), and the flask was left on a vacuum pump overnight. The flask was filled with argon. Anhydrous dichloromethane (8 mL) was added, followed by phosphorus oxychloride (0.47 mL, 5 mmol, 5 equiv.) and freshly distilled pyrrole (0.14 mL, 2 mmol, 2 equiv.). The reaction mixture was stirred for 16 h at 35 °C. It was then allowed to cool to room temperature, diluted with dichloromethane, and washed with brine. The organic layer was dried over sodium sulfate, and solvent was removed under reduced pressure. Anhydrous dichloromethane (16 mL) was added to the resulting red oil. The flask was equipped with a stir bar and septa. It was then evacuated and filled with argon 3 times and cooled to 0 °C. Diisopropylethylamine (0.7 mL, 4 mmol, 4 equiv.) was added dropwise, and the solution was stirred at 0 °C for 10 min. Boron trifluoride diethyl etherate (1 mL, 8 mmol, 8 equiv.) was added dropwise. The reaction was allowed to warm to room temperature and stirred for 1 h. It was then quenched with water and extracted with ethyl acetate. The organic layer was washed with brine and dried over sodium sulfate. Solvent was removed under reduced pressure. The resulting red residue was purified by silica gel column chromatography (10% ethyl acetate in hexanes) to afford **3** (50 mg, 12% yield) as an orange solid. 1H NMR (500 MHz, cdcl3) δ 7.86 (s, 2H), 7.23 (d, *J* = 4.2 Hz, 2H), 6.50 (dd, *J* = 4.4, 1.8 Hz, 2H), 3.64 (s, 3H), 3.40 – 3.18 (m, 2H), 2.68 (qt, *J* = 16.4, 7.4 Hz, 2H), 2.17 (s, 3H), 2.15 (s, 3H), 1.92 (s, 5H), 1.33 (s, 3H). 13C NMR (126 MHz, CDCl3) δ 150.21, 147.08, 145.22, 143.79, 136.86, 130.34, 128.59, 126.16, 123.51, 117.84, 116.93, 74.71, 60.56, 41.48, 33.11, 24.93, 20.74, 12.72, 12.36, 11.87. HRMS (ESI for C24H27BF2N2O2) (M - H): calcd 423.2060, found 423.2064.

**5**21**.** Copper (II) acetylacetonate (3 mg, 0.01 mmol, 0.1 equiv.) was added to a round bottom flask containing **3** (50 mg, 0.1 mmol, 1 equiv.). The flask was equipped with a stir bar and septa, and then evacuated and filled with argon 3 times. Chlorobenzene (1 mL) was added, followed by **4** (94 mg, 0.2 mmol, 2 equiv.) pre-dissolved in chlorobenzene (1 mL). The reaction was heated to 90 °C for 2 h and cooled to room temperature. It was then diluted with dichloromethane and wash with water. The organic layer was dried over sodium sulfate. Solvent was removed under reduced pressure. The resulting black residue was purified by silica gel flash column chromatography (10% ethyl acetate in hexanes) to afford **5** (28 mg, 40% yield) as an orange solid. 1H NMR (500 MHz, CDCl3) δ 3.62 (s, 3H), 3.43 (t, *J* = 6.9 Hz, 2H), 3.29 – 3.15 (m, 2H), 3.01 (q, *J* = 8.9 Hz, 2H), 2.64 (qd, *J* = 17.1, 9.3 Hz, 2H), 2.16 (s, 3H), 2.14 (s, 3H), 1.98 – 1.86 (m, 7H), 1.78 (p, *J* = 7.8 Hz, 2H), 1.64 – 1.55 (m, 2H), 1.30 (s, 3H). 13C NMR (101 MHz, CDCl3) δ 164.80, 150.01, 147.04, 141.87, 140.20, 137.24, 135.41, 131.95, 128.38, 127.18, 126.02, 123.31, 118.56, 116.87, 116.40, 74.56, 60.43, 41.09, 33.63, 32.82, 32.40, 28.75, 28.01, 27.54, 24.71, 20.62, 12.60, 12.29, 11.74. HRMS (ESI for C29H36BBrF2N2O2Na) (M + Na): calcd 595.1914, found 595.1919.

**6.** Anhydrous dichloromethane (0.3 mL) was added to **5** (27 mg, 0.05 mmol, 1 equiv.). The flask was equipped with a stir bar and septa, and then evacuated and filled with argon 3 times. The reaction was cooled to 0 °C. Borontribromide (0.24 mL, 1 M in dichloromethane, 0.24 mmol, 5 equiv.) was added dropwise. The reaction was slowly warmed up to room temperature and stirred for 1.5 h. It was then quenched with water, and the mixture was extracted with ethyl acetate 3 times. The combined organic fractions were washed with brine and dried over anhydrous sodium sulfate. Solvent was removed under reduced pressure. The resulting red oil was re-dissolved in anhydrous dichloromethane (0.3 mL) and anhydrous toluene (0.6 mL). The flask was equipped with a stir bar and septa, and then evacuated and filled with argon 3 times. The reaction was cooled to 0 °C. Diisopropylethylamine (0.03 mL, 0.2 mmol, 4 equiv.) was added dropwise, and the reaction was stirred at 0 °C for 10 min. Boron trifluoride diethyl etherate (0.05 mL, 0.4 mmol, 8 equiv.) was added dropwise. The reaction was allowed to warm to room temperature and stirred for 1 h. It was then quenched with water. The mixture was extracted with ethyl acetate for 3 times. The combined organic fractions were washed with brine and dried over sodium sulfate. Solvent was removed under reduced pressure. The resulting orange residue was purified by silica gel flash column chromatography (15% ethyl acetate in hexanes) to afford **6** (14 mg, 55% yield) as an orange solid. 1H NMR (500 MHz, cdcl3) δ 7.69 (s, 1H), 7.22 (d, *J* = 4.4 Hz, 1H), 7.08 (d, *J* = 4.2 Hz, 1H), 6.43 (dd, *J* = 4.1, 2.0 Hz, 1H), 6.35 (d, *J* = 4.4 Hz, 1H), 4.24 (s, 1H), 3.43 (t, *J* = 6.8 Hz, 2H), 3.28 – 3.11 (m, 2H), 3.02 (dd, *J* = 8.8, 6.9 Hz, 2H), 2.67 (qd, *J* = 16.8, 9.1 Hz, 2H), 2.14 (s, 3H), 2.11 (s, 3H), 1.98 – 1.84 (m, 7H), 1.78 (p, *J* = 7.7 Hz, 2H), 1.64 – 1.54 (m, 2H), 1.29 (s, 3H). 13C NMR (126 MHz, CDCl3) δ 164.75, 145.16, 144.80, 142.04, 140.17, 137.26, 135.43, 131.95, 127.19, 122.96, 121.54, 118.63, 118.55, 116.60, 116.40, 77.29, 77.04, 76.78, 74.35, 40.92, 33.63, 33.12, 32.40, 28.75, 28.01, 27.55, 24.59, 20.71, 12.29, 12.25, 11.33. HRMS (ESI for C28H34BBrF2N2O2Na) (M + Na): calcd 581.1757, found 581.1762.

**mito-H5B-PMHC.** A round bottom flask containing **6** (14 mg, 0.03 mmol, 1 equiv.) was equipped with a stir bar and septa. It was evacuated and filled with argon 3 times. Anhydrous acetonitrile (3 mL) was freeze-pump-thawed 3 times and added to the flask. Sodium iodide (39 mg, 0.3 mmol, 10 equiv.) and triphenylphosphine (68 mg, 0.003 mmol, 10 equiv.) were added and the reaction was stirred at 60 °C for 16 h. The reaction was cooled down to room temperature, and solvent was removed under reduced pressure. The orange residue was dissolved in dichloromethane and washed with water. The aqueous layer was back-extracted twice with dichloromethane. The combined organic layers were dried over anhydrous sodium sulfate. Solvent was removed under reduced pressure. The residue was redissolved in dichloromethane (0.5 mL) and precipitated from diethyl ether (15 mL). The red precipitate was collected by filtration and further purified by silica gel flash chromatography (5% methanol in dichloromethane) to afford **mito-H5B-PMHC** as an orange solid (10 mg, 47% yield). 1H NMR (500 MHz, cd3od) δ 7.89 – 7.68 (m, 14H), 7.60 (s, 1H), 7.28 (d, *J* = 4.5 Hz, 1H), 7.20 (d, *J* = 4.1 Hz, 1H), 6.46 (dd, *J* = 4.1, 2.0 Hz, 1H), 6.41 (d, *J* = 4.4 Hz, 1H), 3.44 – 3.35 (m, 2H), 3.31 (dt, *J* = 3.3, 1.7 Hz, 3H), 3.21 (d, *J* = 13.3 Hz, 1H), 2.93 (t, *J* = 7.6 Hz, 2H), 2.69 (p, *J* = 9.3 Hz, 2H), 2.09 (d, *J* = 4.7 Hz, 6H), 1.93 (hept, *J* = 7.0 Hz, 2H), 1.84 – 1.63 (m, 9H), 1.25 (s, 3H). 13C NMR (126 MHz, CD3OD) δ 164.08, 145.25, 144.71, 143.29, 139.56, 135.52, 134.86 (d, *J* = 3.2 Hz), 133.40 (d, *J* = 10.0 Hz), 132.27, 130.11 (d, *J* = 12.5 Hz), 127.70, 123.41, 122.02, 120.77, 118.87, 118.35, 118.18, 116.34, 115.94, 74.19, 48.11, 47.95, 47.77, 47.60, 47.43, 47.26, 47.09, 39.16, 32.93, 29.50 (d, *J* = 16.3 Hz), 27.61, 27.06, 23.94, 21.46, 21.38 (d, *J* = 11.5 Hz), 20.93, 20.29, 11.43, 11.13, 10.47. HRMS (ESI for C46H49BF2N2O2P) (M): calcd 741.3588, found 741.3588.

**8**18**.** Anhydrous toluene (8 mL) was added to **1** (0.2 g, 0.7 mmol, 1 equiv.). The flask was equipped with a stir bar and septa. It was then evacuated and filled with argon 3 times. Dimethylformamide (1 drop) was added while stirring, followed by thionyl chloride (0.06 mL, 0.9 mmol, 1.2 equiv.). The reaction was stirred at 50 °C for 1 h. Volatiles were removed under reduced pressure. Residue thionyl chloride was then removed by co-evaporation with anhydrous toluene (8 mL, 2 times), and the flask was left on a vacuum pump overnight to remove residual thionyl chloride. The flask was filled with argon. Anhydrous dichloromethane (8 mL) was added, followed by phosphorus oxychloride (0.34 mL, 3.6 mmol, 5 equiv.) and **6** (0.43 g, 1.4 mmol, 2 equiv.) pre-dissolved in anhydrous dichloromethane (1 mL). The reaction mixture was stirred for 16 h at 35 °C. It was then allowed to cool to room temperature, diluted with dichloromethane, and washed with brine. The organic layer was dried over sodium sulfate, and solvent was removed under reduced pressure. Anhydrous dichloromethane (10 mL) was added to the resulting red oil. The flask was equipped with a stir bar and septa. It was then evacuated and filled with argon 3 times and cooled to -10 °C. Borontribromide (3.6 mL, 1 M in dichloromethane, 3.6 mmol, 5 equiv.) was added dropwise while stirring. The reaction mixture was allowed to slowly warm to room temperature and stir at room temperature for 1.5 h. It was then quenched with water, and the suspension was extracted with ethyl acetate. The organic fractions were washed with brine and dried over sodium sulfate. Solvent was removed under reduced pressure. Anhydrous dichloromethane (6 mL) and anhydrous toluene (12 mL) was added to the resulting red oil. The flask was equipped with a stir bar and septa. It was then evacuated and filled with argon 3 times and cooled to 0 °C. Diisopropylethylamine (0.5 mL, 2.8 mmol, 4 equiv.) was added dropwise, and the solution was stirred at 0 °C for 10 min. Boron trifluoride diethyl etherate (0.7 mL, 5.8 mmol, 8 equiv.) was added dropwise. The reaction was allowed to warm to room temperature and stirred for 1 h. It was then quenched with water and extracted with ethyl acetate. The organic layer was washed with brine and dried over sodium sulfate. Solvent was removed under reduced pressure. The resulting red residue was purified by silica gel column chromatography (10% ethyl acetate in hexanes). Further purification by silica gel column chromatography (50% dichloromethane in hexanes) to afford **7b** (15 mg, 3% yield) as a red solid. 1H NMR (400 MHz, cdcl3) δ 7.12 (d, *J* = 4.2 Hz, 2H), 6.33 (d, *J* = 4.2 Hz, 2H), 3.48 (t, *J* = 6.8 Hz, 4H), 3.28 – 3.07 (m, 6H), 2.73 – 2.58 (m, 2H), 2.36 – 2.25 (m, 4H), 2.13 (d, *J* = 14.4 Hz, 6H), 1.87 (dd, *J* = 7.7, 6.1 Hz, 2H), 1.28 (s, 3H). 13C NMR (126 MHz, cdcl3) δ 159.55, 145.28, 144.95, 140.74, 136.29, 129.69, 123.04, 121.66, 118.76, 117.65, 116.72, 77.42, 77.16, 76.91, 74.45, 40.91, 33.17, 33.03, 31.98, 27.50, 24.70, 20.83, 12.43, 12.38, 11.46. HRMS (ESI for C29H35BF2N2O2Na) (M + Na): calcd 673.1019, found 673.1029.

**lyso-H4B-PMHC.** An oven-dried 25 mL round bottom flask was equipped with a stir bar and septa. Compound **9** (53 mg, 0.08 mmol, 1 equiv.) pre-dissolved in anhydrous acetonitrile (4 mL) was added, followed by potassium carbonate (45 mg, 0.3 mmol, 4 equiv.). The flask was evacuated and filled with argon 3 times. Dimethylamine (2 M solution in THF, 0.16 mL, 0.3 mmol, 4 equiv.) were added while stirring. The reaction was stirred at 60 for 2 h. Solvent was removed under reduced pressure. The resulting residue was purified using silica gel flash chromatography (10% methanol in dichloromethane) to afford **lyso-H4B-PMHC** as a red solid (8.3 mg, 19% yield). 1H NMR (400 MHz, CDCl3) δ 7.11 (d, *J* = 4.4 Hz, 1H), 7.03 (d, *J* = 4.1 Hz, 1H), 6.30 (d, *J* = 4.1 Hz, 1H), 5.93 (d, *J* = 4.4 Hz, 1H), 3.21 – 2.97 (m, 4H), 2.81 – 2.73 (m, 2H), 2.73 – 2.57 (m, 2H), 2.56 (s, 7H), 2.12 (d, *J* = 15.5 Hz, 8H), 1.95 (s, 3H), 1.84 (t, *J* = 7.0 Hz, 2H), 1.26 (s, 5H), 0.91 (d, *J* = 4.2 Hz, 2H). 13C NMR (126 MHz, cdcl3) δ 166.11, 156.83, 145.28, 144.98, 138.58, 136.43, 135.55, 130.90, 127.86, 122.94, 121.80, 118.94, 116.74, 116.40, 113.05, 74.49, 58.34, 44.11, 40.72, 33.04, 26.01, 25.10, 24.74, 20.82, 12.47, 12.43, 11.49, 11.46, 11.41, 10.84. HRMS (ESI for C31H41BF2N3O2) (M + H): calcd 536.3255, found 536.3270.

**Scheme S1.** Plausible mechanism of cyclo-propyl side-chain formation.

**10**18. Anhydrous toluene (8 mL) was added to **1** (0.25 g, 0.9 mmol, 1 equiv.). The flask was equipped with a stir bar and septa. It was then evacuated and filled with argon 3 times. Dimethylformamide (1 drop) was added while stirring, followed by thionyl chloride (0.08 mL, 1 mmol, 1.2 equiv.). The reaction was stirred at 50 °C for 1 h. Volatiles were removed under reduced pressure. Residue thionyl chloride was then removed by co-evaporation with anhydrous toluene (8 mL, 2 times), and the flask was left on a vacuum pump overnight. The flask was filled with argon. Anhydrous dichloromethane (9 mL) was added, followed by phosphorus oxychloride (0.42 mL, 4.5 mmol, 5 equiv.) and **9** (0.54 g, 1.8 mmol, 2 equiv.) pre-dissolved in anhydrous dichloromethane (2 mL). The reaction mixture was stirred for 16 h at 35 °C. It was then allowed to cool to room temperature, diluted with dichloromethane, and washed with brine. The organic layer was dried over sodium sulfate, and solvent was removed under reduced pressure. Anhydrous dichloromethane (22 mL) was added to the resulting red oil. The flask was equipped with a stir bar and septa. It was then evacuated and filled with argon 3 times and cooled to -10 °C. Borontribromide (4.5 mL, 1 M in dichloromethane, 4.5 mmol, 5 equiv.) was added dropwise while stirring. The reaction mixture was allowed to slowly warm to room temperature and stir at room temperature for 1.5 h. It was then quenched with water, and the suspension was extracted with ethyl acetate. The organic fractions were washed with brine and dried over sodium sulfate. Solvent was removed under reduced pressure. Anhydrous dichloromethane (7 mL) and anhydrous toluene (14 mL) was added to the resulting red oil. The flask was equipped with a stir bar and septa. It was then evacuated and filled with argon 3 times and cooled to 0 °C. Diisopropylethylamine (0.63 mL, 3.6 mmol, 4 equiv.) was added dropwise, and the solution was stirred at 0 °C for 10 min. Boron trifluoride diethyl etherate (0.89 mL, 7.1 mmol, 8 equiv.) was added dropwise. The reaction was allowed to warm to room temperature and stirred for 1 h. It was then quenched with water and extracted with ethyl acetate. The organic layer was washed with brine and dried over sodium sulfate. Solvent was removed under reduced pressure. The resulting red residue was purified by silica gel column chromatography (5% ethyl acetate in hexanes). Further purification by silica gel column chromatography (50% dichloromethane in hexanes) to afford **10** (77 mg, 10% yield) as a red solid. 1H NMR (500 MHz, cdcl3) δ 7.07 (d, *J* = 4.3 Hz, 2H), 6.29 (d, *J* = 4.2 Hz, 2H), 4.26 (s, 1H), 3.41 (t, *J* = 6.9 Hz, 4H), 3.24 – 3.06 (m, 2H), 2.99 (t, *J* = 7.8 Hz, 4H), 2.67 (tq, *J* = 17.1, 7.4 Hz, 2H), 2.14 (s, 3H), 2.10 (s, 3H), 1.96 (s, 3H), 1.86 (h, *J* = 7.0 Hz, 6H), 1.73 (p, *J* = 7.8 Hz, 4H), 1.47 – 1.26 (m, 31H). 13C NMR (126 MHz, CDCl3) δ 161.75, 145.07, 144.89, 139.43, 135.77, 128.99, 122.94, 121.48, 118.59, 116.88, 116.62, 74.33, 40.63, 34.09, 33.01, 32.87, 29.60, 29.50, 29.45, 29.44, 28.77, 28.72, 28.51, 28.20, 24.48, 20.72, 12.30, 12.25, 11.32. HRMS (ESI for C45H67BBr2F2N2O2) (M + Na): calcd 899.3503, found 899.3502.

**11**. An oven-dried 25 mL round bottom flask was equipped with a stir bar and septa. Compound **10** (100 mg, 0.1 mmol, 1 equiv.) pre-dissolved in anhydrous acetonitrile (10 mL) was added, followed by potassium carbonate (63 mg, 0.5 mmol, 4 equiv.). The flask was evacuated and filled with argon 3 times. Dimethylamine (0.23 mL, 2 M solution in THF, 0.5 mmol, 4 equiv.) was added while stirring. The reaction was stirred at 60 for 2 h. A second portion of dimethylamine (0.23 mL, 2 M solution in THF, 0.5 mmol, 4 equiv.) was added, and the reaction was stirred at 60 for another hour. Solvent was removed under reduced pressure. The resulting residue was purified using silica gel column chromatography (5% methanol in dichloromethane, 0.1% triethylamine) to afford **11** as a red film (55 mg, 59% yield). 1H NMR (500 MHz, CDCl3) δ 7.07 (d, *J* = 4.3 Hz, 2H), 6.27 (d, *J* = 4.2 Hz, 2H), 3.24 – 3.04 (m, 2H), 2.97 (t, *J* = 7.8 Hz, 4H), 2.76 – 2.39 (m, 18H), 2.13 (s, 3H), 2.10 (s, 3H), 1.93 (s, 3H), 1.86 (t, *J* = 7.0 Hz, 2H), 1.71 (p, *J* = 7.9 Hz, 4H), 1.66 – 1.54 (m, 4H), 1.45 – 1.21 (m, 31H). 13C NMR (126 MHz, CDCl3) δ 161.67, 145.20, 144.86, 139.45, 135.75, 129.02, 122.80, 122.03, 119.18, 116.88, 116.52, 74.26, 59.07, 44.22, 40.65, 32.96, 29.52, 29.42, 29.39, 29.27, 28.69, 28.46, 27.09, 26.04, 24.50, 20.71, 12.41, 12.30, 11.46. HRMS (ESI for C49H81BF2N4O2) (M + 2H): calcd 403.3205, found 403.3208.

**PM-H4B-PMHC**. Anhydrous toluene (4 mL) was added to **11** (33 mg, 0.04 mmol, 1 equiv.). The flask was equipped with a stir bar and septa. 1,3-propane sultone (50 mg, 0.4 mmol, 10 equiv.) was added while stirring. The flask was evacuated and filled with argon 3 times. The solution was sonicated until all solid was dissolved and was then refluxed for 2 h, during which a red oily precipitate was formed. The reaction was then cooled to room temperature. The precipitate was washed with diethyl ether and ethyl acetate and dried under vacuum. The resulting residue was purified using silica gel column chromatography (20% water in methanol). The resulting red residue was redissolved in methanol and filtered to afford **PM-H4B-PMHC** as a red film (20 mg, 48% yield). 1H NMR (500 MHz, CD3OD) δ 7.15 (d, *J* = 4.3 Hz, 2H), 6.32 (d, *J* = 4.2 Hz, 2H), 3.55 – 3.40 (m, 4H), 3.34 – 3.21 (m, 10H), 3.13 (d, *J* = 13.5 Hz, 1H), 3.05 (s, 12H), 2.94 (hept, *J* = 7.7 Hz, 4H), 2.86 (t, *J* = 6.8 Hz, 4H), 2.67 (tq, *J* = 16.0, 8.6 Hz, 2H), 2.16 (dq, *J* = 14.5, 6.7 Hz, 4H), 2.10 (s, 6H), 1.90 (td, *J* = 6.9, 4.0 Hz, 2H), 1.83 (s, 3H), 1.74 (q, *J* = 7.8 Hz, 8H), 1.45 – 1.32 (m, 28H), 1.24 (s, 3H). 13C NMR (126 MHz, cd3od) δ 162.53, 146.58, 146.21, 142.03, 137.16, 130.80, 124.72, 123.50, 122.12, 118.04, 117.77, 75.49, 65.58, 63.79, 51.24, 49.51, 49.46, 49.34, 49.28, 49.17, 49.11, 49.00, 48.85, 48.83, 48.68, 48.66, 48.62, 48.49, 40.40, 34.28, 30.64, 30.52, 30.50, 30.48, 30.41, 30.14, 29.87, 29.66, 27.38, 25.20, 23.47, 21.71, 19.90, 12.90, 12.62, 11.92. HRMS (ESI for C55H90BF2N4O8S2) (M - H): calcd 1047.6266, found 1047.6326. IR (neat) 2922.79, 2851.07, 1570.44, 1486.44, 1434.59, 1186.57, 1140.41, 1082.59, 1033.19, 946.66, 723.16, 603.09, 521.41 cm-1.

**4**21. To a 50 mL round bottom flask equipped with a stir bar, 6-bromohexanoic acid (1.95 g, 10 mmol, 1 equiv.) and dichloromethane (15 mL) were added, followed by 4-dimethylaminopyridine (0.12 g, 1 mmol, 0.1 equiv.) and hydrogen peroxide (30% in H2O, 1.5 mL, 13 mmol, 1.3 equiv.). The reaction was cooled to 0 . N,N’-dicyclohexylcarbodiimide (2.48 g, 12 mmol, 1.2 equiv.) was added, and the reaction was stirred at 0 for 1.5 h. The reaction was then diluted with dichloromethane (25 mL) and filtered through a short pad of silica gel. Solvent was removed under reduced pressure. The resulting pale-yellow oil was further purified by automated silica gel column chromatography (5% ethyl acetate in hexanes) to afford **4** as a colorless oil (1.87 g, 48% yield). 1H NMR (500 MHz, CDCl3) δ 3.38 (t, *J* = 6.8 Hz, 2H), 2.43 (t, *J* = 7.4 Hz, 2H), 1.86 (dt, *J* = 15.1, 6.9 Hz, 2H), 1.77 – 1.66 (m, 2H), 1.56 – 1.46 (m, 2H). 13C NMR (126 MHz, CDCl3) δ 168.91, 77.41, 77.16, 76.91, 33.28, 32.22, 29.81, 27.44, 24.01. The product was not submitted to HRMS due to safety considerations.

**Scheme S2.** Synthetic route to **mito-H5B-CH3**.

**S1**18. Anhydrous dichloromethane (34 mL) was added to an oven-dried 100 mL round bottom flask. The flask was equipped with a stir bar and septa. It was then evacuated and filled with argon 3 times. Acetyl chloride (0.25 mL, 3.5 mmol, 1 equiv.) was added, and the reaction was cooled to 0 . Phosphorus oxychloride (1.63 mL, 17.5 mmol, 5 equiv.) and freshly distilled pyrrole (0.49 mL, 7 mmol, 2 equiv.) were added dropwise. The bath was allowed to expire, and the reaction stirred at room temperature for 16 h. The reaction was again cooled to 0 . Diisopropylethylamine (2.44 mL, 14 mmol, 4 equiv.) was added dropwise, and the solution was stirred for 10 min at 0 . Boron trifluoride diethyl etherate (3.46 mL, 28 mmol, 8 equiv.) was added dropwise. The solution was allowed to warm to room temperature and stirred for 1 h. The reaction was then filtered through a short pad of silica gel and eluted with dichloromethane until the red color stopped coming through. Solvent was removed under reduced pressure. The resulting residue was purified using silica gel column chromatography (10% ethyl acetate in hexanes) to afford **S1** as a red solid (30.6 mg, 4.2% yield). 1H NMR (500 MHz, Chloroform-*d*) δ 7.85 (s, 2H), 7.30 (d, *J* = 4.3 Hz, 2H), 6.54 (m, 2H), 2.63 (s, 3H). 13C NMR (126 MHz, CDCl3) δ 146.02, 143.56, 135.69, 128.17, 118.12, 16.29. HRMS (ESI for C10H8BF2N2) (M - H): calcd 205.0754, found 205.0743.

**S2**21. Copper (II) acetylacetonate (16.1 mg, 0.06 mmol, 0.1 equiv.) was added to a round bottom flask containing **S1** (127 mg, 0.62 mmol, 1 equiv.). The flask was equipped with a stir bar and septa, and then evacuated and filled with argon 3 times. Chlorobenzene (4 mL) was added, followed by **4** (480 mg, 1.2 mmol, 2 equiv.) pre-dissolved in chlorobenzene (1 mL). The reaction was heated to 90 for 2 h and cooled to room temperature. It was then diluted with dichloromethane and the mixture was washed with water. The organic layer was dried over sodium sulfate. Solvent was removed under reduced pressure. The resulting black residue was purified by silica gel flash column chromatography (10% ethyl acetate in hexanes) to afford **S2** (68.5 mg, 31% yield) as an orange solid. 1H NMR (500 MHz, CDCl3) δ 7.69 (s, 1H), 7.28 (d, *J* = 4.4 Hz, 1H), 7.15 (d, *J* = 4.1 Hz, 1H), 6.47 (dd, *J* = 4.2, 2.0 Hz, 1H), 6.41 (d, *J* = 4.4 Hz, 1H), 3.42 (t, *J* = 6.8 Hz, 2H), 3.02 (t, *J* = 7.8 Hz, 2H), 2.56 (s, 3H), 1.98 – 1.88 (m, 2H), 1.78 (p, *J* = 7.7 Hz, 2H), 1.63 – 1.55 (m, 2H). 13C NMR (126 MHz, CDCl3) δ 164.51, 142.87, 140.19, 136.04, 134.50, 129.65, 125.39, 118.93, 116.77, 33.76, 32.52, 28.80, 28.11, 27.74, 15.86. HRMS (ESI for C15H17BBrF2N2) (M - H): calcd 353.0641, found 353.0650.

**mito-H5B-CH3**. Anhydrous acetonitrile (6 mL) was added to **S2** (20 mg, 0.06 mmol, 1 equiv.) at room temperature. The flask was equipped with a stir bar and septa. Sodium iodide (84 mg, 0.6 mmol, 10 equiv.) was added, followed by triphenylphosphine (148 mg, 0.6 mmol, 10 equiv.). The flask was evacuated and filled with argon 3 times, and the reaction was refluxed for 16 h. Solvent was removed under reduced pressure. The residue was redissolved in dichloromethane and washed with water. The aqueous layer was back-extracted twice with dichloromethane. The organic fractions were combined and dried over sodium sulfate. Solvent was removed under reduced pressure. The residue was redissolved in dichloromethane (0.5 mL) and precipitated from diethyl ether (15 mL). The red precipitate was collected by filtration and further purified by silica gel flash chromatography (5% methanol in dichloromethane) to afford **mito-H5B-CH3** as a brown film (21 mg, 60% yield). 1H NMR (500 MHz, CDCl3) δ 7.86 – 7.65 (m, 15H), 7.58 (s, 1H), 7.29 (d, *J* = 4.4 Hz, 1H), 7.12 (d, *J* = 4.0 Hz, 1H), 6.56 (d, *J* = 4.4 Hz, 1H), 6.45 (dd, *J* = 4.1, 2.1 Hz, 1H), 3.67 (ddd, *J* = 12.6, 9.5, 6.0 Hz, 2H), 2.92 (t, *J* = 7.2 Hz, 2H), 2.54 (s, 3H), 1.87 – 1.69 (m, 6H). 13C NMR (126 MHz, cdcl3) δ 164.85, 142.59, 139.12, 135.05 (d, *J* = 3.1 Hz), 133.74 (d, *J* = 10.0 Hz), 130.51 (d, *J* = 12.6 Hz), 130.16, 124.84, 120.13, 118.50, 117.82, 116.32, 29.58 (d, *J* = 16.2 Hz), 28.10, 27.54, 22.81 (d, *J* = 50.1 Hz), 21.78, 15.77. HRMS (ESI for C33H33BF2N2P) (M): calcd 537.2437, found 537.2441.

**7.** Carbon tetrabromide (1.6 g, 4.8 mmol, 1.2 equiv.) was added to **S3**1 (0.5 g, 4 mmol, 1 equiv.). The flask was equipped with a stir bar. Dichloromethane (84 mL) was added, and the reaction was cooled to 0 . Triphenylphosphine (1.26 g, 4.8 mmol, 1.2 equiv.) was added in one portion. The flask was evacuated and filled with argon 3 times. The reaction was left in bath to thaw and stirred at room temperature for 16 h. Solvent was removed under reduced pressure. The resulting brown oil was purified by automated silica gel chromatography (10% ethyl acetate in hexanes) to afford **7** as a colorless oil (0.68 g, 90% yield). 1H NMR (500 MHz, CDCl3) δ 7.99 (s, 1H), 6.69 (td, *J* = 2.6, 1.5 Hz, 1H), 6.15 (q, *J* = 2.9 Hz, 1H), 5.95 (tdt, *J* = 2.3, 1.5, 0.8 Hz, 1H), 3.44 (t, *J* = 6.4 Hz, 2H), 2.80 (t, *J* = 7.2 Hz, 2H), 2.15 (tt, *J* = 7.1, 6.4 Hz, 3H). 13C NMR (126 MHz, CDCl3) δ 130.39, 116.55, 108.57, 105.62, 33.42, 32.57, 25.87. HRMS (ESI for C7H11NBr) (M): calcd 188.0070, found 188.0077.

**Scheme S3.** Synthetic route to **lyso-H4B-CH3**.

**S4**18**.** Anhydrous dichloromethane (16 mL) was added to an oven-dried 25 mL round bottom flask. The flask was equipped with a stir bar and septa. It was then evacuated and filled with argon 3 times. Acetyl chloride (0.15 mL, 2.1 mmol, 1 equiv.) was added, followed by phosphorus oxychloride (1.0 mL, 10.7 mmol, 5 equiv.). Compound **7** (0.79 g, 4.2 mmol, 2 equiv.) pre-dissolved in dichloromethane (3 mL) was then added dropwise to the reaction. The reaction mixture was refluxed for 16 h. It was allowed to cool to room temperature, diluted with dichloromethane, and washed with brine. The organic fraction was dried over sodium sulfate and solvent was removed under reduced pressure. Anhydrous dichloromethane (15 mL) and anhydrous toluene (30 mL) was added to the resulting red residue. The flask was equipped with a stir bar and septa. It was evacuated and filled with argon 3 times and cooled to 0. Diisopropylethylamine (1.5 mL, 8.5 mmol, 4 equiv.) was added dropwise, and the solution was stirred for 10 min at 0 . Boron trifluoride diethyl etherate (2.1 mL, 17 mmol, 8 equiv.) was added dropwise. The solution was allowed to warm to room temperature and stirred for 1 h. The solution was then quenched with water. The suspension was extracted with ethyl acetate. The organic layer was dried over sodium sulfate, and solvent was removed under reduced pressure. Solvent was removed under reduced pressure. The resulting residue was purified using alumina column chromatography (10% ethyl acetate in hexanes) to afford **S4** as a red solid (0.2 g, 20% yield). 1H NMR (500 MHz, cdcl3) δ 7.17 (d, *J* = 4.2 Hz, 2H), 6.37 (d, *J* = 4.2 Hz, 2H), 3.48 (t, *J* = 6.7 Hz, 4H), 3.13 (t, *J* = 7.6 Hz, 5H), 2.51 (s, 3H), 2.34 – 2.27 (m, 4H). 13C NMR (126 MHz, CDCl3) δ 159.20, 141.28, 134.98, 127.37, 117.78, 77.28, 77.23, 77.03, 76.77, 32.86, 31.89, 27.31, 15.48. HRMS (ESI for C16H19BBr2F2N2Na) (M): calcd 470.9848, found 470.9850.

**lyso-H4B-CH3.** An oven-dried 25 mL round bottom flask was equipped with a stir bar and septa. Compound **S4** (49 mg, 0.1 mmol, 1 equiv.) pre-dissolved in anhydrous acetonitrile (5 mL) was added, followed by potassium carbonate (61 mg, 0.4 mmol, 4 equiv.). The flask was evacuated and filled with argon 3 times. Dimethylamine (2 M solution in THF, 0.22 mL, 0.4 mmol, 4 equiv.) was added while stirring. The reaction was stirred at 60 for 2 h. Solvent was removed under reduced pressure. The resulting residue was purified using silica gel column chromatography (10% methanol in dichloromethane) to afford **lyso-H4B-CH3** as a red solid (18 mg, 49% yield). 1H NMR (400 MHz, cdcl3) δ 7.16 (d, *J* = 4.5 Hz, 1H), 7.09 (d, *J* = 4.2 Hz, 1H), 6.35 (d, *J* = 4.2 Hz, 1H), 5.98 (d, *J* = 4.5 Hz, 1H), 3.05 (t, *J* = 7.4 Hz, 2H), 2.89 – 2.78 (m, 2H), 2.61 (s, 7H), 2.47 (s, 3H), 2.19 (p, *J* = 7.5 Hz, 2H), 1.31 – 1.21 (m, 2H), 0.96 – 0.85 (m, 2H). 13C NMR (101 MHz, CDCl3) δ 165.90, 156.13, 139.17, 135.11, 134.32, 128.60, 125.70, 116.50, 113.28, 57.97, 43.77, 25.70, 24.76, 15.27, 11.27, 10.63. HRMS (ESI for C18H25N3BF2) (M): calcd 332.2105, found 332.2109.

**Scheme S4.** Synthetic route to pyrrole **9**.

**S5.** 11-Bromoundecanoic acid (5 g, 18.9 mmol, 1 equiv.) was added to a 100 mL flask equipped with a stir bar. Acetic acid (40 mL) and potassium acetate (2.78 g, 28.3 mmol, 1.5 equiv.) were added and the reaction was refluxed for 48 h. The reaction was cooled down to room temperature, and acetic acid was removed by co-evaporation with toluene. The residue was dissolved in water and acidified with 2 M HCl to pH < 1. The solution was extracted with ethyl acetate. The organic layer was dried over anhydrous sodium sulfate. Solvent was removed under reduced pressure to afford **S5** as a white solid. The crude product was used as is for the following reaction.

**S6**. Compound **S5** (18.9 mmol, 1 equiv.) was added to an oven-dried 250 mL round bottom flask. Anhydrous toluene (170 mL) was added. The flask was evacuated and filled with argon 3 times. Dimethylformamide (1 drop) was added, followed by thionyl chloride (1.65 mL, 22.6 mmol, 1.2 equiv.). The reaction was then stirred at 50 for 1 h. It was then cooled to room temperature, and volatiles were removed under reduced pressure. The flask was left on a vacuum pump overnight to remove residual thionyl chloride, affording **S6** as a colorless oil. The crude product was used as is for the following reaction.

**S7**. Anhydrous dichloromethane (35 mL) was added to an oven-dried 250 mL round bottom flask equipped with a stir bar. The flask was evacuated and filled with argon 3 times. Dimethylamine (11.3 mL, 2 M in THF, 22.7 mmol, 1.2 equiv.) was added, followed by triethylamine (7.9 mL, 56.7 mmol, 3 equiv.). The mixture was cooled to -40 . Compound **S6** (18.9 mmol, 1 equiv.) pre-dissolved in anhydrous dichloromethane (50 mL) was added dropwise to the reaction over 20 minutes. The reaction was allowed to warm up to -10 and stirred for 3 h. Water was added, and the organic layer was dried over anhydrous sodium sulfate. Solvent was removed under reduced pressure to afford **S7** was a white solid. The crude product was used as is for the following reaction.

**S8**. Diethyl ether (14 mL) was added to **S7** (18.9 mmol, 1.2 equiv.) and the flask was equipped with a stir bar and septa. The flask was evacuated and filled with argon 3 times. The reaction was cooled to 0 . Phosphorus oxychloride (1.58 mL, 17 mmol, 1.2 equiv.) was added dropwise. The reaction was allowed to warm up to room temperature and stirred for 1 h. The reaction was then cooled to 0 , and pyrrole (0.88 mL, 14 mmol, 1 equiv.) was added dropwise. The reaction was left in bath to thaw and stirred at room temperature for 16 h. An aqueous solution of sodium acetate (7 g, 85 mmol, 5 equiv.) was added. The biphasic mixture was stirred at room temperature for 1 h and extracted with dichloromethane. The organic layer was dried over anhydrous sodium sulfate, and solvent was removed under reduced pressure. The brown residue was purified by silica gel flash chromatography (10% ethyl acetate in hexanes) to afford **S8** as a white solid (1.45 g, 26% yield from 11-bromoundecanoic acid, over 4 steps). 1H NMR (500 MHz, CDCl3) δ 9.36 (s, 1H), 7.03 (td, *J* = 2.7, 1.3 Hz, 1H), 6.91 (ddd, *J* = 3.8, 2.4, 1.3 Hz, 1H), 6.29 (dt, *J* = 3.8, 2.5 Hz, 1H), 4.06 (t, *J* = 6.8 Hz, 2H), 2.80 – 2.73 (m, 2H), 2.06 (s, 3H), 1.72 (p, *J* = 7.5 Hz, 2H), 1.67 – 1.57 (m, 2H), 1.39 – 1.25 (m, 12H). 13C NMR (126 MHz, CDCl3) δ 191.09, 171.28, 132.11, 124.16, 115.82, 110.57, 64.67, 38.02, 29.45, 29.43, 29.40, 29.37, 29.22, 28.60, 25.90, 25.25, 21.05. HRMS (ESI for C17H27NNaO3) (M + Na+): calcd 316.1884, found 316.1882.

**S9**33. Isopropanol (290 mL) was added to **S8** (1.45 g, 5.0 mmol, 1 equiv.). The flask was equipped with a stir bar. Sodium borohydride (2.25 g, 59.5 mmol, 12 equiv.) was added to the solution while stirring. The flask was then equipped with septa, evacuated, and filled with argon 3 times. The reaction was refluxed for 16 h. The hot reaction mixture was poured into 300 mL ice water and acidified with 2 M HCl to pH < 1. Volatiles were removed under reduced pressure. Water was added to the oily residue, and the suspension was extracted with dichloromethane. The organic layer was washed with brine and dried over anhydrous sodium sulfate. Solvent was removed under reduced pressure. The resulting white solid was purified by automated flash silica gel chromatography (10% ethyl acetate in hexanes) to afford **S9** as a while solid (0.86 g, 73% yield). 1H NMR (500 MHz, CDCl3) δ 7.98 (s, 1H), 6.69 (td, *J* = 2.6, 1.5 Hz, 1H), 6.16 (q, *J* = 2.9 Hz, 1H), 5.94 (q, *J* = 2.4 Hz, 1H), 3.67 (t, *J* = 6.6 Hz, 2H), 2.65 – 2.59 (m, 2H), 1.68 – 1.56 (m, 4H), 1.46 – 1.22 (m, 14H). 13C NMR (126 MHz, CDCl3) δ 133.01, 116.09, 108.33, 104.95, 77.41, 77.36, 77.16, 76.91, 63.22, 32.92, 29.80, 29.70, 29.66, 29.55, 29.53, 29.50, 27.86, 25.86. HRMS (ESI for C17H27NNaO3) (M + Na+): calcd 238.2166, found 238.2173.

**9**. Carbon tetrabromide (1.35 g, 4.1 mmol, 1.2 equiv.) was added to **S9** (0.86 g, 3.4 mmol, 1 equiv.). The flask was equipped with a stir bar. Anhydrous dichloromethane (72 mL) was added, and the reaction was cooled to 0 while stirring. Triphenylphosphine (1.07 g, 4.1 mmol, 1.2 equiv.) was added in one portion. The flask was evacuated and filled with argon 3 times. The reaction was left in bath to thaw and stirred at room temperature for 16 h. Solvent was removed under reduced pressure. The resulting brown oil was purified by automated flash silica gel chromatography (5% ethyl acetate in hexanes) to afford **9** as a yellow solid (0.77 g, 75% yield). 1H NMR (500 MHz, CDCl3) δ 7.90 (s, 1H), 6.66 (td, *J* = 2.6, 1.6 Hz, 1H), 6.13 (q, *J* = 2.9 Hz, 1H), 5.94 – 5.89 (m, 1H), 3.41 (t, *J* = 6.9 Hz, 2H), 2.60 (t, *J* = 7.7 Hz, 2H), 1.85 (dq, *J* = 8.6, 6.9 Hz, 2H), 1.67 – 1.57 (m, 2H), 1.46 – 1.26 (m, 14H). 13C NMR (126 MHz, CDCl3) δ 132.87, 115.97, 108.26, 104.87, 77.29, 77.24, 77.04, 76.79, 34.09, 32.85, 29.68, 29.52, 29.43, 29.38, 28.77, 28.19, 27.75. HRMS (ESI for C15H26BrNCl) (M + Cl-): calcd 334.0942, found 334.0939.

**Scheme S5.** Synthetic route to **PM-H4B-CH3**.

**S10**. Anhydrous dichloromethane (7 mL) was added to an oven-dried 25 mL round bottom flask. The flask was equipped with a stir bar and septa. It was then evacuated and filled with argon 3 times. Acetyl chloride (0.06 mL, 0.8 mmol, 1 equiv.) was added, followed by phosphorus oxychloride (0.39 mL, 4.1 mmol, 5 equiv.). Compound **9** (0.50 g, 1.7 mmol, 2 equiv.) pre-dissolved in anhydrous dichloromethane (1 mL) was then added dropwise to the reaction. The reaction was refluxed for 16 h. It was allowed to cool to room temperature, diluted with dichloromethane, and washed with brine. The organic fraction was dried over sodium sulfate and solvent was removed under reduced pressure. Anhydrous dichloromethane (6 mL) and anhydrous toluene (12 mL) was added to the resulting red residue. The flask was equipped with a stir bar and septa. It was evacuated and filled with argon 3 times and cooled to 0 . Diisopropylethylamine (0.58 mL, 3.3 mmol, 4 equiv.) was added dropwise, and the solution was stirred for 10 min at 0 . Boron trifluoride diethyl etherate (0.82 mL, 6.7 mmol, 8 equiv.) was added dropwise. The solution was allowed to warm to room temperature and stirred for 1 h. The solution was then quenched with water. The suspension was extracted with ethyl acetate. The organic layer was dried over sodium sulfate, and solvent was removed under reduced pressure. The resulting residue was purified using alumina column chromatography (5% ethyl acetate in hexanes) to afford **S10** as an orange film (0.1 g, 19% yield) 1H NMR (500 MHz, CDCl3) δ 7.13 (d, *J* = 4.3 Hz, 2H), 6.32 (d, *J* = 4.2 Hz, 2H), 3.40 (t, *J* = 6.9 Hz, 4H), 2.98 (t, *J* = 7.9 Hz, 4H), 2.49 (s, 3H), 1.90 – 1.80 (m, 4H), 1.72 (p, *J* = 7.5 Hz, 4H), 1.45 – 1.27 (m, 28H). 13C NMR (126 MHz, CDCl3) δ 161.55, 140.11, 134.59, 126.79, 117.12, 34.09, 32.87, 29.57, 29.49, 29.44, 29.43, 28.77, 28.67, 28.60, 28.20, 15.33. HRMS (ESI for C32H51BBr2F2N2) (M - H): calcd 671.2386, found 671.23608.

**S11**. An oven-dried 25 mL round bottom flask was equipped with a stir bar and septa. Compound **S10** (96 mg, 0.1 mmol, 1 equiv.) pre-dissolved in anhydrous acetonitrile (10 mL) was added, followed by potassium carbonate (80 mg, 0.6 mmol, 4 equiv.). The flask was evacuated and filled with argon 3 times. Dimethylamine (2 M solution in THF, 0.29 mL, 0.6 mmol, 4 equiv.) was added while stirring. The reaction was stirred at 60 for 2 h. A second portion of dimethylamine (2 M solution in THF, 0.29 mL, 0.6 mmol, 4 equiv.) was added, and the reaction was stirred at 60 for another hour. Solvent was removed under reduced pressure. The resulting residue was purified using silica gel column chromatography (5% methanol in dichloromethane, 0.1% triethylamine) to afford **S11** as an orange film (60 mg, 70% yield). 1H NMR (500 MHz, cdcl3) δ 7.12 (d, *J* = 4.3 Hz, 2H), 6.32 (d, *J* = 4.2 Hz, 2H), 2.98 (t, *J* = 7.8 Hz, 4H), 2.48 (s, 3H), 2.36 – 2.30 (m, 4H), 2.28 (s, 12H), 1.72 (p, *J* = 7.5 Hz, 4H), 1.53 – 1.46 (m, 4H), 1.45 – 1.37 (m, 4H), 1.34 – 1.26 (m, 24H). 13C NMR (126 MHz, cdcl3) δ 161.52, 140.09, 134.57, 126.77, 117.11, 59.64, 45.04, 29.58, 29.54, 29.50, 29.46, 28.66, 28.59, 27.38, 27.16, 15.30. HRMS (ESI for C36H63BF2N4) (M + H): calcd 601.5187, found 601.5208.

**PM-H4B-CH3**. Anhydrous toluene (3 mL) was added to **S11** (18 mg, 0.03 mmol, 1 equiv.). The flask was equipped with a stir bar and septa. 1,3-propane sultone (36 mg, 0.3 mmol, 10 equiv.) was added while stirring. The flask was evacuated and filled with argon 3 times. The solution was sonicated until all solid was dissolved and refluxed for 2 h, during which a red oily precipitate was formed. The reaction was then cooled to room temperature. The precipitate was washed with diethyl ether and ethyl acetate and dried under vacuum. The resulting residue was purified using silica gel column chromatography (20% water in methanol). The resulting orange residue was redissolved in methanol and filtered to afford **PM-H4B-CH3** as an orange film (20 mg, 80% yield). 1H NMR (500 MHz, cd3od) δ 7.31 (d, *J* = 4.3 Hz, 2H), 6.39 (d, *J* = 4.3 Hz, 2H), 3.57 – 3.41 (m, 4H), 3.33 – 3.24 (m, 5H), 3.07 (s, 12H), 2.93 (t, *J* = 7.8 Hz, 4H), 2.86 (t, *J* = 6.8 Hz, 4H), 2.53 (s, 3H), 2.18 (dq, *J* = 14.8, 6.7 Hz, 4H), 1.81 – 1.68 (m, 8H), 1.48 – 1.27 (m, 28H). 13C NMR (126 MHz, CD3OD) δ 160.98, 141.05, 134.47, 127.11, 116.98, 64.16, 62.37, 29.27, 29.13, 29.09, 29.02, 28.75, 28.50, 28.20, 25.98, 22.07, 18.51, 13.92. HRMS (ESI for C42H75BF2N4O6S2) (M + Na): calcd 867.5082, found 867.5082. IR (neat): 2924.16, 2853.21, 1579.09, 1488.38, 1467.29, 1440.55, 1406.28, 1345.63, 1282.36, 1194.27, 1142.25, 1090.51, 1038.84 cm-1.

**Scheme S6.** Structures of **QA2-H4B-CH3** and **QA2-H3B-CH3**.

**Reference**

33. Kancharla, P.; Lu, W.; Salem, S. M.; Kelly, J. X.; Reynolds, K. A., Stereospecific Synthesis of 23-Hydroxyundecylprodiginines and Analogues and Conversion to Antimalarial Premarineosins via a Rieske Oxygenase Catalyzed Bicyclization. *The Journal of Organic Chemistry* **2014,** *79* (23), 11674-11689.
